# Supplementary material
Source: PubMed Central journal article supplement (PMC4509593)
Supplement: NIHMS666246-supplement-supp_table_1.pdf [file NIHMS666246-supplement-supp_table_1.pdf]

### ChIP-Seq Datasets

| Panel    | This study                        | Other studies                                      |
|----------|-----------------------------------|----------------------------------------------------|
| 1a-e     | GSM1555116 H3.3 (H3.3 WT)         | GSM1033638 H3K27me3 (Banaszynski et. al. 2013)     |
|          | GSM1429914 H3K9me3 (H3.3 WT)      | GSM1033640 H3K27ac (Banaszynski et. al. 2013)      |
|          | GSM1555155 H3.3-H3K9me3 (ESET WT) | SRR036180 H3K4me1 (Goldberg et. al. 2010)          |
|          | GSM1555120 KAP1 (H3.3 WT)         | GSM1033636 H3K4me3 (Banaszynski et. al. 2013)      |
|          |                                   | SRR643530 H3K9me2 (Das et. al. 2014)               |
|          |                                   | SRR572715 H3K9ac (Teif et. al. 2012)               |
|          |                                   | GSM459273 SETDB1/ESET (Bilodeau et. al. 2009)      |
| 1f       |                                   | SRR0074347 H3K20me3 (Mikkelsen et. al. 2007)       |
|          |                                   | SRR036149 H3.3-HA (NPC) (Goldberg et. al. 2010)    |
|          |                                   | SRR036169 H3.3-HA (ESC) (Goldberg et. al. 2010)    |
|          |                                   | SRR006805 H3K9me3 (NPC) (Mikkelsen et. al. 2007)   |
| 1g       | GSM1555155 H3.3-H3K9me3 (ESET WT) | SRR007435 H3K9me3 (ESC) (Mikkelsen et. al. 2007)   |
|          | GSM1555156 H3.3-H3K9me3 (ESET KO) |                                                    |
| 2a-c     | GSM1555116 H3.3 (WT)              | GSM459273 H3.3-HA (HIRA KO) Noh K-M, unpublished   |
|          | GSM1555117 H3.3 (H3.3 KO1)        | SETDB1/ESET (Bilodeau et. al. 2009)                |
|          | GSM1555138 H3.3 (ATR X KO)        | GSM1372574 ATRX (Sarma et. al. 2014)               |
|          | GSM1429929 H3.3-HA (DAXX KO)      |                                                    |
|          | GSM1555120 KAP1 (H3.3 WT)         |                                                    |
|          | GSM1429920 DAXX (H3.3 WT)         |                                                    |
| 2d       | GSM1555149 H3.3 (KAP1 WT)         |                                                    |
|          | GSM1555150 H3.3 (KAP1 KO)         |                                                    |
|          | GSM1555153 H3.3 (ESET WT)         |                                                    |
|          | GSM1555154 H3.3 (ESET KO)         |                                                    |
| 2f       | GSM1555120 KAP1 (H3.3 WT)         |                                                    |
|          | GSM1555121 KAP1 (H3.3 KO1)        |                                                    |
|          | GSM1555122 KAP1 (H3.3 KO2)        |                                                    |
| 3a       | GSM1429917 H3 (H3.3 WT)           |                                                    |
|          | GSM1429918 H3 (H3.3 KO1)          |                                                    |
|          | GSM1429919 H3 (H3.3 KO2)          |                                                    |
|          | GSM1429914 H3K9me3 (H3.3 WT)      |                                                    |
|          | GSM1429915 H3K9me3 (H3.3 KO1)     |                                                    |
|          | GSM1429916 H3K9me3 (H3.3 KO2)     |                                                    |
| ED Fig 1 | GSM1555116 H3.3 (H3.3 WT)         | GSM459273 SETDB1/ESET (Bilodeau et. al. 2009)      |
|          | GSM1555137 H3.3 (ATR X WT)        | GSM487555 H3.3-HA (C6 WT) (Noh K-M, unpublished)   |
|          | GSM1555139 H3.3 (ATR X WT)        | GSM487555 H3.3-HA (W9.5 WT) (Noh K-M, unpublished) |
|          | GSM1555141 H3.3-HA (ATR X WT)     | GSM423355 H3.3-HA (C6 WT) (Goldberg et. al. 2010)  |
|          | GSM1555120 KAP1 (H3.3 WT)         | SRR0074347 H3K20me3 (Mikkelsen et. al. 2007)       |
|          | GSM1555155 H3.3-H3K9me3 (ESET WT) | SRR007435 H3K9me3 (ESC) (Mikkelsen et. al. 2007)   |
|          | GSM1429914 H3K9me3 (H3.3 WT)      | SRR031672 H3K9me3 (Bilodeau et. al. 2009)          |
|          | GSM1555143 H3K9me3 (ATR X WT)     | SRR031675 H3K9me3 (Bilodeau et. al. 2009)          |
|          | GSM1555134 H3K9me3 (DAXX WT)      | SRR031677 H3K9me3 (Bilodeau et. al. 2009)          |
|          | GSM1555120 KAP1 (H3.3 WT)         | GSM1033638 H3K27me3 (Banaszynski et. al. 2013)     |
|          | GSM1555123 KAP1 (H3.3 WT) mAb     | GSM1033640 H3K27ac (Banaszynski et. al. 2013)      |
|          |                                   | SRR036180 H3K4me1 (Goldberg et. al. 2010)          |
|          |                                   | GSM1033636 H3K4me3 (Banaszynski et. al. 2013)      |
|          |                                   | SRR643530 H3K9me2 (Das et. al. 2014)               |
|          |                                   | GSM1372574 ATRX (Sarma et. al. 2014)               |
|          |                                   | GSM1207788 HIRA (Banaszynski et. al. 2013)         |
|          |                                   | SRR057566 ATRX (Law et. al. 2014)                  |
| ED Fig 2 | GSM1555116 H3.3 (H3.3 WT)         |                                                    |
|          | GSM1429914 H3K9me3 (H3.3 WT)      |                                                    |
|          | GSM1555155 H3.3-H3K9me3 (ESET WT) |                                                    |
|          | GSM1429923 Input FA (H3.3 WT)     |                                                    |
|          | GSM1555128 Input native (H3.3 WT) |                                                    |

**ChIP-Seq Datasets**

| <b>Panel</b>    | <b>This study</b> |                       | <b>Other studies</b> |                                 |                                 |
|-----------------|-------------------|-----------------------|----------------------|---------------------------------|---------------------------------|
| <b>ED Fig 3</b> | GSM1555116        | H3.3 (WT)             |                      |                                 |                                 |
|                 | GSM1555117        | H3.3 (H3.3 KO1)       |                      |                                 |                                 |
| <b>ED Fig 4</b> | GSM1555116        | H3.3 (H3.3 WT)        |                      |                                 |                                 |
|                 | GSM1429914        | H3K9me3 (H3.3 WT)     |                      |                                 |                                 |
| <b>ED Fig 5</b> | GSM1555116        | H3.3 (WT)             | SRR579161            | Dnase                           |                                 |
|                 |                   |                       | GSM1386358           | H3.3-HA 3 hrs                   | (Yildirim et. al. 2014)         |
|                 |                   |                       | GSM1386359           | H3.3-HA 6 hrs                   | (Yildirim et. al. 2014)         |
|                 |                   |                       | GSM1386362           | H3.3-HA No Dox                  | (Yildirim et. al. 2014)         |
|                 |                   |                       | SRR974801            | MNase Seq "open"                | (Chen et. al. 2013)             |
|                 |                   |                       | SRR974802            | MNase Seq "position"            | (Chen et. al. 2013)             |
| <b>ED Fig 6</b> |                   |                       | GSM423358            | RNAPII_CTD4H8_xChIPSec          | (Goldberg et. al. 2010)         |
|                 |                   |                       | SRR036149            | H3.3-HA (NPC)                   | (Goldberg et. al. 2010)         |
|                 |                   |                       | SRR036169            | H3.3-HA (ESC)                   | (Goldberg et. al. 2010)         |
|                 |                   |                       | SRR006805            | H3K9me3 (NPC)                   | (Mikkelsen et. al. 2007)        |
|                 |                   |                       | SRR007435            | H3K9me3 (ESC)                   | (Mikkelsen et. al. 2007)        |
|                 |                   |                       | GSM727425            | H3K9me3 (ESET WT)               | (Karimi et. al. 2011)           |
|                 |                   |                       | GSM727426            | H3K9me3 (ESET KO)               | (Karimi et. al. 2011)           |
|                 |                   |                       | SRR1262945           | H3K9me3 (WT)                    | (Bulut-Karslioglu et. al. 2014) |
|                 |                   | SRR1262947            | H3K9me3 (Suv39h DKO) | (Bulut-Karslioglu et. al. 2014) |                                 |
| <b>ED Fig 7</b> | GSM1555120        | KAP1 (H3.3 WT)        |                      |                                 |                                 |
|                 | GSM1555149        | H3.3 (KAP1 WT)        |                      |                                 |                                 |
|                 | GSM1555150        | H3.3 (KAP1 KO)        |                      |                                 |                                 |
|                 | GSM1555120        | KAP1 (H3.3 WT)        |                      |                                 |                                 |
|                 | GSM1555121        | KAP1 (H3.3 KO1)       |                      |                                 |                                 |
|                 | GSM1555122        | KAP1 (H3.3 KO2)       |                      |                                 |                                 |
|                 | GSM1429920        | DAXX (H3.3 WT)        |                      |                                 |                                 |
|                 | GSM1429921        | DAXX (H3.3 KO1)       |                      |                                 |                                 |
| GSM1429922      | DAXX (H3.3 KO2)   |                       |                      |                                 |                                 |
| <b>ED Fig 8</b> | GSM1555116        | H3.3 (WT)             | SRR611521            | H3K9me3 (KAP1 WT)               | (Rowe et. al. 2013)             |
|                 | GSM1555117        | H3.3 (H3.3 KO1)       | SRR611522            | H3K9me3 (KAP1 KO)               | (Rowe et. al. 2013)             |
|                 | GSM1429914        | H3K9me3 (H3.3 WT)     |                      |                                 |                                 |
|                 | GSM1429915        | H3K9me3 (H3.3 KO1)    |                      |                                 |                                 |
|                 | GSM1429916        | H3K9me3 (H3.3 KO2)    |                      |                                 |                                 |
|                 | GSM1555120        | KAP1 (H3.3 WT)        |                      |                                 |                                 |
|                 | GSM1555121        | KAP1 (H3.3 KO1)       |                      |                                 |                                 |
|                 | GSM1555122        | KAP1 (H3.3 KO2)       |                      |                                 |                                 |
| <b>ED Fig 9</b> | GSM1555116        | H3.3 (H3.3 WT)        |                      |                                 |                                 |
|                 | GSM1429906        | H3.3 (H3.3 KD1)       |                      |                                 |                                 |
|                 | GSM1555117        | H3.3 (H3.3 KO1)       |                      |                                 |                                 |
|                 | GSM1429903        | H3K9me3 (WT)          |                      |                                 |                                 |
|                 | GSM1429903        | H3K9m3 (H3.3 KD1)     |                      |                                 |                                 |
|                 | GSM1429909        | H3 (H3.3 WT)          |                      |                                 |                                 |
|                 | GSM1429910        | H3 (H3.3 KD1)         |                      |                                 |                                 |
|                 | GSM1429907        | H3.1/2 (WT)           |                      |                                 |                                 |
|                 | GSM1429926        | H3.2-HA (KD1) addback |                      |                                 |                                 |
|                 | GSM1429927        | H3.3-HA (KD1) addback |                      |                                 |                                 |
|                 | GSM1555126        | H3.2-HA (KO1) addback |                      |                                 |                                 |
|                 | GSM1555127        | H3.3-HA (KO1) addback |                      |                                 |                                 |
